# Supplementary material for: Isolation and patch size drive specialist plant species density within steppe islands: a case study of kurgans in southern Ukraine
Source: Springer Nature journal article supplement (doi:10.1007/s10531-016-1077-y), 2016-03-19
Supplement: MOESM2 [file 9837398]

## **Online Resource 2:**

### **List of all plant species registered within sampling plots of steppe vegetation in southern Ukraine**

Isolation and patch size drive specialist plant species density within steppe islands: a case study of kurgans in southern Ukraine

*Biodiversity and Conservation*

Iwona Dembicz\*, Ivan I. Moysiyenko, Anastasia Shaposhnikova, Denys Vynokurov,

Łukasz Kozub, Barbara Sudnik-Wójcikowska

\*Department of Plant Ecology and Environmental Conservation, Institute of Botany, Faculty of Biology, University of Warsaw, Al. Ujazdowskie 4, 00-478 Warsaw, Poland; e-mail: [i.dembicz@biol.uw.edu.pl](mailto:i.dembicz@biol.uw.edu.pl)

List of all plant species registered within sampling plots of steppe vegetation in southern Ukraine, where species classification as HS – steppe habitat specialists or G - generalists is given. Occurrence K notes if a species was registered only on kurgans, R – exclusively within larger steppe enclaves, and KR – in both plot types. Species nomenclature according to Mosyakin and Fedoronchuk (1999). Protection status in Ukraine: RBU – Red Data Book of Ukraine (Didukh 2009), RLKhR – Red List of Kherson Region (2013)

| Species name                                                      | Status of the species | Occurrence | Protection status |
|-------------------------------------------------------------------|-----------------------|------------|-------------------|
| <i>Achillea leptophylla</i> M.Bieb.                               | HS                    | K          |                   |
| <i>Allium paniculatum</i> L.                                      | HS                    | K          |                   |
| <i>Astragalus dasyanthus</i> Pall.                                | HS                    | K          | RBU               |
| <i>Astragalus varius</i> S.G.Gmel.                                | HS                    | K          |                   |
| <i>Carex melanostachya</i> M.Bieb. ex Willd.                      | HS                    | K          |                   |
| <i>Cymbophasma borysthenica</i> (Pall. ex Schlecht.) Klokov & Zoz | HS                    | K          | RBU               |
| <i>Ferula caspica</i> M.Bieb.                                     | HS                    | K          | RLKhR             |
| <i>Gypsophila paniculata</i> L.                                   | HS                    | K          |                   |
| <i>Hylotelephium stepposum</i> (Boriss.) Tzvelev                  | HS                    | K          |                   |
| <i>Hylotelephium triphyllum</i> (Haw.) Holub                      | HS                    | K          | RLKhR             |
| <i>Limonium bungei</i> (Claus) Gamajun.                           | HS                    | K          |                   |
| <i>Limonium sareptanum</i> (A.Becker) Gams                        | HS                    | K          |                   |
| <i>Linum</i> sp.                                                  | HS                    | K          |                   |
| <i>Pastinaca clausii</i> (Ledeb.) M.Pimen.                        | HS                    | K          |                   |
| <i>Prangos odontalgica</i> (Pall.) Herrnst. & Heyn                | HS                    | K          | RLKhR             |
| <i>Ranunculus oxyspermus</i> Willd.                               | HS                    | K          |                   |
| <i>Trinia</i> sp.                                                 | HS                    | K          |                   |
| <i>Tulipa biebersteiniana</i> Schult. & Schult. f. s.l.           | HS                    | K          | RBU               |
| <i>Verbascum austriacum</i> Schott ex Roem. & Schult.             | HS                    | K          |                   |
| <i>Verbascum x pseudophoeniceum</i> Reichardt                     | HS                    | K          |                   |
| <i>Allium flavescens</i> Besser                                   | HS                    | R          | RLKhR             |
| <i>Alyssum tortuosum</i> Waldst. & Kit. ex Willd.                 | HS                    | R          |                   |
| <i>Asparagus officinalis</i> L.                                   | HS                    | R          |                   |
| <i>Astragalus onobrychis</i> L.                                   | HS                    | R          |                   |
| <i>Astragalus</i> sp.                                             | HS                    | R          |                   |
| <i>Astragalus ucrainicus</i> M.Pop. & Klokov                      | HS                    | R          |                   |
| <i>Bellevalia sarmatica</i> (Pall. ex Georgi) Woronow             | HS                    | R          | RLKhR             |

| Species name                                         | Status of the species | Occurrence | Protection status |
|------------------------------------------------------|-----------------------|------------|-------------------|
| <i>Bromopsis heterophylla</i> (Klokov) Holub         | HS                    | R          | RLKhR             |
| <i>Campanula bononiensis</i> L.                      | HS                    | R          |                   |
| <i>Campanula sibirica</i> L.                         | HS                    | R          |                   |
| <i>Cleistogenes bulgarica</i> (Bornm.) Keng          | HS                    | R          |                   |
| <i>Convolvulus lineatus</i> L.                       | HS                    | R          |                   |
| <i>Cruciata pedemontana</i> (Bellardi) Ehrend.       | HS                    | R          |                   |
| <i>Crupina vulgaris</i> Cass.                        | HS                    | R          |                   |
| <i>Cuscuta cf. approximata</i> Bab.                  | HS                    | R          |                   |
| <i>Dianthus pseudoarmeria</i> M.Bieb.                | HS                    | R          |                   |
| <i>Draba nemorosa</i> L.                             | HS                    | R          |                   |
| <i>Eremogone biebersteinii</i> (Schlecht.) Holub     | HS                    | R          |                   |
| <i>Euphorbia glareosa</i> Pall. ex M.Bieb.           | HS                    | R          |                   |
| <i>Festuca pseudovina</i> Hack. ex Wiesb.            | HS                    | R          |                   |
| <i>Festuca rupicola</i> Heuff.                       | HS                    | R          |                   |
| <i>Galium volhynicum</i> Pobed.                      | HS                    | R          |                   |
| <i>Haplophyllum suaveolens</i> (DC.) G.Don f.        | HS                    | R          |                   |
| <i>Inula oculus-christi</i> L.                       | HS                    | R          |                   |
| <i>Leontodon biscutellifolius</i> DC.                | HS                    | R          |                   |
| <i>Leontodon</i> sp.                                 | HS                    | R          |                   |
| <i>Leymus ramosus</i> (Trin.) Tzvelev                | HS                    | R          |                   |
| <i>Minuartia hybrida</i> (Vill.) Schischk.           | HS                    | R          |                   |
| <i>Onobrychis gracilis</i> Besser                    | HS                    | R          |                   |
| <i>Otites hellmannii</i> (Claus) Klokov              | HS                    | R          |                   |
| <i>Pimpinella titanophila</i> Woronow                | HS                    | R          |                   |
| <i>Plantago urvillei</i> Opiz                        | HS                    | R          |                   |
| <i>Pleconax subconica</i> (Friv.) Sourkova           | HS                    | R          |                   |
| <i>Potentilla incana</i> P.Gaertn., B.Mey. & Scherb. | HS                    | R          |                   |
| <i>Poterium polygamum</i> Waldst. & Kit.             | HS                    | R          |                   |
| <i>Salvia aethiopsis</i> L.                          | HS                    | R          |                   |
| <i>Scorzonera stricta</i> Hornem.                    | HS                    | R          |                   |
| <i>Silene bupleuroides</i> L.                        | HS                    | R          |                   |
| <i>Teucrium polium</i> L.                            | HS                    | R          |                   |
| <i>Thalictrum minus</i> L.                           | HS                    | R          |                   |
| <i>Thymus dimorphus</i> Klokov & Des.-Shost.         | HS                    | R          |                   |
| <i>Veronica austriaca</i> L.                         | HS                    | R          |                   |
| <i>Veronica capsellcarpa</i> Dubovik                 | HS                    | R          | RLKhR             |
| <i>Vinca herbacea</i> Waldst. & Kit.                 | HS                    | R          | RLKhR             |
| <i>Viola ambigua</i> Waldst. & Kit.                  | HS                    | R          |                   |
| <i>Viola hirta</i> L.                                | HS                    | R          |                   |
| <i>Achillea nobilis</i> L.                           | HS                    | KR         |                   |
| <i>Agropyron pectinatum</i> (M.Bieb.) P.Beauv.       | HS                    | KR         |                   |

| Species name                                           | Status of the species | Occurrence | Protection status |
|--------------------------------------------------------|-----------------------|------------|-------------------|
| <i>Allium guttatum</i> Steven                          | HS                    | KR         |                   |
| <i>Allium inaequale</i> Janka                          | HS                    | KR         |                   |
| <i>Allium paczoskianum</i> Tuzs.                       | HS                    | KR         |                   |
| <i>Allium sphaerocephalon</i> L.                       | HS                    | KR         |                   |
| <i>Androsace elongata</i> L.                           | HS                    | KR         |                   |
| <i>Artemisia lerchiana</i> Weber ex Stechm.            | HS                    | KR         |                   |
| <i>Asperula montana</i> Waldst. & Kit. ex Willd.       | HS                    | KR         |                   |
| <i>Astragalus pallescens</i> M.Bieb.                   | HS                    | KR         |                   |
| <i>Bromopsis riparia</i> (Rehmann) Holub               | HS                    | KR         |                   |
| <i>Carex stenophylla</i> Wahlenb.                      | HS                    | KR         |                   |
| <i>Carex supina</i> Willd. ex Wahlenb.                 | HS                    | KR         |                   |
| <i>Dianthus campestris</i> M.Bieb.                     | HS                    | KR         |                   |
| <i>Dianthus carbonatus</i> Klokov                      | HS                    | KR         |                   |
| <i>Dianthus lanceolatus</i> Steven ex Rchb.            | HS                    | KR         |                   |
| <i>Ephedra distachya</i> L.                            | HS                    | KR         | RLKhR             |
| <i>Eremogone rigida</i> (M.Bieb.) Fenzl                | HS                    | KR         |                   |
| <i>Euphorbia leptocaula</i> Boiss.                     | HS                    | KR         |                   |
| <i>Euphorbia seguieriana</i> Neck.                     | HS                    | KR         |                   |
| <i>Festuca valesiaca</i> Schleich. ex Gaudin           | HS                    | KR         |                   |
| <i>Gagea bulbifera</i> (Pall.) Salisb.                 | HS                    | KR         |                   |
| <i>Gagea pusilla</i> (F.W.Schmidt) Schult. & Schult.f. | HS                    | KR         |                   |
| <i>Galatella villosa</i> (L.) Rchb.f.                  | HS                    | KR         |                   |
| <i>Galium ruthenicum</i> Willd.                        | HS                    | KR         |                   |
| <i>Goniolimon besserianum</i> (Schult.) Kusn.          | HS                    | KR         |                   |
| <i>Goniolimon tataricum</i> (L.) Boiss.                | HS                    | KR         |                   |
| <i>Helichrysum arenarium</i> (L.) Moench               | HS                    | KR         |                   |
| <i>Herniaria bessereri</i> Fisch. ex Hornem.           | HS                    | KR         |                   |
| <i>Hyacinthella leucophaea</i> (K.Koch) Schur          | HS                    | KR         | RLKhR             |
| <i>Hypericum elegans</i> Stephan ex Willd.             | HS                    | KR         |                   |
| <i>Iris pumila</i> L.                                  | HS                    | KR         |                   |
| <i>Jurinea arachnoidea</i> Bunge                       | HS                    | KR         |                   |
| <i>Jurinea multiflora</i> (L.) B.Fedtsch.              | HS                    | KR         |                   |
| <i>Kochia prostrata</i> (L.) Schrad.                   | HS                    | KR         |                   |
| <i>Koeleria cristata</i> (L.) Pers.                    | HS                    | KR         |                   |
| <i>Linum austriacum</i> L.                             | HS                    | KR         |                   |
| <i>Medicago minima</i> (L.) Bartal.                    | HS                    | KR         |                   |
| <i>Melica transsilvanica</i> Schur                     | HS                    | KR         |                   |
| <i>Ornithogalum kochii</i> Parl.                       | HS                    | KR         |                   |
| <i>Orobanche</i> sp.                                   | HS                    | KR         |                   |
| <i>Otites densiflorus</i> (D'Urv.) Grossh.             | HS                    | KR         |                   |
| <i>Phlomis hybrida</i> Zelen.                          | HS                    | KR         |                   |

| Species name                              | Status of the species | Occurrence | Protection status |
|-------------------------------------------|-----------------------|------------|-------------------|
| <i>Phlomis pungens</i> Willd.             | HS                    | KR         |                   |
| <i>Phlomis tuberosa</i> L.                | HS                    | KR         |                   |
| <i>Potentilla astracanica</i> Jacq.       | HS                    | KR         |                   |
| <i>Potentilla recta</i> L.                | HS                    | KR         |                   |
| <i>Potentilla semilaciniosa</i> Borbás    | HS                    | KR         |                   |
| <i>Ranunculus illyricus</i> L.            | HS                    | KR         |                   |
| <i>Rochelia retorta</i> (Pall.) Lipsky    | HS                    | KR         |                   |
| <i>Scorzonera mollis</i> M.Bieb.          | HS                    | KR         |                   |
| <i>Serratula erucifolia</i> (L.) Boriss.  | HS                    | KR         |                   |
| <i>Stipa capillata</i> L.                 | HS                    | KR         | RBU               |
| <i>Stipa lessingiana</i> Trin. & Rupr.    | HS                    | KR         | RBU               |
| <i>Stipa ucrainica</i> P.Smirn.           | HS                    | KR         | RBU               |
| <i>Tanacetum millefolium</i> (L.) Tzvelev | HS                    | KR         |                   |
| <i>Taraxacum erythrospermum</i> Andrz.    | HS                    | KR         |                   |
| <i>Thymus marschallianus</i> Willd.       | HS                    | KR         |                   |
| <i>Valeriana tuberosa</i> L.              | HS                    | KR         |                   |
| <i>Veronica spicata</i> aggr.             | HS                    | KR         |                   |
| <i>Bromopsis inermis</i> (Leyss.) Holub   | G                     | K          |                   |
| <i>Cannabis sativa</i> L.                 | G                     | K          |                   |
| <i>Cardaria draba</i> (L.) Desv.          | G                     | K          |                   |
| <i>Chenopodium album</i> L.               | G                     | K          |                   |
| <i>Chorispota tenella</i> (Pall.) DC.     | G                     | K          |                   |
| <i>Crepis ramosissima</i> D'Urv.          | G                     | K          |                   |
| <i>Crepis rhoeadifolia</i> M.Bieb.        | G                     | K          |                   |
| <i>Euphorbia virgata</i> Waldst. & Kit.   | G                     | K          |                   |
| <i>Fallopia convolvulus</i> (L.) A.L,ve   | G                     | K          |                   |
| <i>Filago arvensis</i> L.                 | G                     | K          |                   |
| <i>Galium aparine</i> L.                  | G                     | K          |                   |
| <i>Hypericum perforatum</i> L.            | G                     | K          |                   |
| <i>Kochia scoparia</i> (L.) Schrad.       | G                     | K          |                   |
| <i>Lactuca saligna</i> L.                 | G                     | K          |                   |
| <i>Lactuca tatarica</i> (L.) C.A.Mey.     | G                     | K          |                   |
| <i>Leonurus cardiaca</i> L.               | G                     | K          |                   |
| <i>Lepidium perfoliatum</i> L.            | G                     | K          |                   |
| <i>Lycopsis orientalis</i> L.             | G                     | K          |                   |
| <i>Melandrium album</i> (Mill.) Garcke    | G                     | K          |                   |
| <i>Myosotis arvensis</i> (L.) Hill        | G                     | K          |                   |
| <i>Nonea rossica</i> Steven               | G                     | K          |                   |
| <i>Papaver dubium</i> L.                  | G                     | K          |                   |
| <i>Papaver</i> sp.                        | G                     | K          |                   |
| <i>Pilosella echiioides</i> aggr.         | G                     | K          |                   |

| Species name                                                           | Status of the species | Occurrence | Protection status |
|------------------------------------------------------------------------|-----------------------|------------|-------------------|
| <i>Polycnemum arvense</i> L.                                           | G                     | K          |                   |
| <i>Polycnemum majus</i> A.Braun                                        | G                     | K          |                   |
| <i>Salsola tragus</i> L. s.str.                                        | G                     | K          |                   |
| <i>Sonchus arvensis</i> L.                                             | G                     | K          |                   |
| <i>Trifolium pratense</i> L.                                           | G                     | K          |                   |
| <i>Verbascum phlomoides</i> L.                                         | G                     | K          |                   |
| <i>Veronica dillenii</i> Crantz                                        | G                     | K          |                   |
| <i>Vicia tenuifolia</i> Roth                                           | G                     | K          |                   |
| <i>Vicia tetrasperma</i> (L.) Schreb.                                  | G                     | K          |                   |
| <i>Vicia villosa</i> Roth                                              | G                     | K          |                   |
| <i>Aegilops cylindrica</i> Host                                        | G                     | R          |                   |
| <i>Ajuga chia</i> Schreb.                                              | G                     | R          |                   |
| <i>Bromus wolgensis</i> Fisch. ex Jacq.f.                              | G                     | R          |                   |
| <i>Centaurea salonitana</i> Vis.                                       | G                     | R          |                   |
| <i>Ceratocephalus testiculatus</i> (Crantz) Roth                       | G                     | R          |                   |
| <i>Crataegus</i> sp.                                                   | G                     | R          |                   |
| <i>Erodium cicutarium</i> (L.) L'Her.                                  | G                     | R          |                   |
| <i>Gleditsia triacanthos</i> L.                                        | G                     | R          |                   |
| <i>Lathyrus tuberosus</i> L.                                           | G                     | R          |                   |
| <i>Marrubium praecox</i> Janka                                         | G                     | R          |                   |
| <i>Medicago lupulina</i> L.                                            | G                     | R          |                   |
| <i>Plantago lanceolata</i> L. subsp. <i>lanuginosa</i> (Bast.) Arcang. | G                     | R          |                   |
| <i>Poa compressa</i> L.                                                | G                     | R          |                   |
| <i>Salvia nutans</i> L.                                                | G                     | R          |                   |
| <i>Sideritis montana</i> L.                                            | G                     | R          |                   |
| <i>Stachys recta</i> L.                                                | G                     | R          |                   |
| <i>Taraxacum serotinum</i> (Waldst. & Kit.) Poir.                      | G                     | R          |                   |
| <i>Thesium arvense</i> Horv.                                           | G                     | R          |                   |
| <i>Xeranthemum annum</i> L.                                            | G                     | R          |                   |
| <i>Achillea setacea</i> Waldst. & Kit.                                 | G                     | KR         |                   |
| <i>Alyssum desertorum</i> Stapf                                        | G                     | KR         |                   |
| <i>Anisantha tectorum</i> (L.) Nevski                                  | G                     | KR         |                   |
| <i>Anthemis ruthenica</i> M.Bieb.                                      | G                     | KR         |                   |
| <i>Arabidopsis thaliana</i> (L.) Heynh.                                | G                     | KR         |                   |
| <i>Arenaria uralensis</i> Pall. ex Spreng.                             | G                     | KR         |                   |
| <i>Artemisia austriaca</i> Jacq.                                       | G                     | KR         |                   |
| <i>Atriplex oblongifolia</i> Waldst. & Kit.                            | G                     | KR         |                   |
| <i>Berteroa incana</i> (L.) DC.                                        | G                     | KR         |                   |
| <i>Bromus squarrosus</i> L.                                            | G                     | KR         |                   |
| <i>Buglossoides arvensis</i> (L.) I.M.Johnst.                          | G                     | KR         |                   |

| Species name                                                      | Status of the species | Occurrence | Protection status |
|-------------------------------------------------------------------|-----------------------|------------|-------------------|
| <i>Camelina microcarpa</i> Andr. ex DC.                           | G                     | KR         |                   |
| <i>Capsella bursa-pastoris</i> (L.) Medik.                        | G                     | KR         |                   |
| <i>Carduus uncinatus</i> M.Bieb.                                  | G                     | KR         |                   |
| <i>Carex praecox</i> Schreb.                                      | G                     | KR         |                   |
| <i>Cerastium glutinosum</i> Fries                                 | G                     | KR         |                   |
| <i>Chondrilla juncea</i> L.                                       | G                     | KR         |                   |
| <i>Chondrilla latifolia</i> M.Bieb.                               | G                     | KR         |                   |
| <i>Cirsium arvense</i> (L.) Scop.                                 | G                     | KR         |                   |
| <i>Consolida orientalis</i> (J.Gay ex Gren. & Godr.) Schroedinger | G                     | KR         |                   |
| <i>Consolida paniculata</i> (Host) Schur                          | G                     | KR         |                   |
| <i>Convolvulus arvensis</i> L.                                    | G                     | KR         |                   |
| <i>Cuscuta campestris</i> Yunck.                                  | G                     | KR         |                   |
| <i>Descurainia sophia</i> (L.) Webb ex Prantl                     | G                     | KR         |                   |
| <i>Elytrigia repens</i> (L.) Nevski                               | G                     | KR         |                   |
| <i>Erophila verna</i> (L.) Besser                                 | G                     | KR         |                   |
| <i>Eryngium campestre</i> L.                                      | G                     | KR         |                   |
| <i>Erysimum diffusum</i> Ehrh.                                    | G                     | KR         |                   |
| <i>Euphorbia agraria</i> M.Bieb.                                  | G                     | KR         |                   |
| <i>Falcaria vulgaris</i> Bernh.                                   | G                     | KR         |                   |
| <i>Galium humifusum</i> M.Bieb.                                   | G                     | KR         |                   |
| <i>Galium spurium</i> L.                                          | G                     | KR         |                   |
| <i>Glaucium corniculatum</i> (L.) J.Rudolph                       | G                     | KR         |                   |
| <i>Holosteum umbellatum</i> L.                                    | G                     | KR         |                   |
| <i>Lactuca serriola</i> L.                                        | G                     | KR         |                   |
| <i>Lamium amplexicaule</i> L.                                     | G                     | KR         |                   |
| <i>Lappula patula</i> (Lehm.) Menyh.                              | G                     | KR         |                   |
| <i>Linaria biebersteinii</i> Besser                               | G                     | KR         |                   |
| <i>Linaria genistifolia</i> (L.) Mill.                            | G                     | KR         |                   |
| <i>Medicago falcata</i> L.                                        | G                     | KR         |                   |
| <i>Myosotis micrantha</i> Pall. ex Lehm.                          | G                     | KR         |                   |
| <i>Nigella arvensis</i> L.                                        | G                     | KR         |                   |
| <i>Poa angustifolia</i> L.                                        | G                     | KR         |                   |
| <i>Poa bulbosa</i> L.                                             | G                     | KR         |                   |
| <i>Polygonum aviculare</i> L. s.str.                              | G                     | KR         |                   |
| <i>Polygonum novoascanicum</i> Klokov                             | G                     | KR         |                   |
| <i>Potentilla argentea</i> L.                                     | G                     | KR         |                   |
| <i>Pterotheca sancta</i> (L.) K.Koch                              | G                     | KR         |                   |
| <i>Reseda lutea</i> L.                                            | G                     | KR         |                   |
| <i>Salvia nemorosa</i> L.                                         | G                     | KR         |                   |
| <i>Securigera varia</i> (L.) Lassen                               | G                     | KR         |                   |

| Species name                                | Status of the species | Occurrence | Protection status |
|---------------------------------------------|-----------------------|------------|-------------------|
| <i>Senecio jacobaea</i> L.                  | G                     | KR         |                   |
| <i>Senecio vernalis</i> Waldst. & Kit.      | G                     | KR         |                   |
| <i>Seseli tortuosum</i> L.                  | G                     | KR         |                   |
| <i>Sisymbrium altissimum</i> L.             | G                     | KR         |                   |
| <i>Sisymbrium loeselii</i> L.               | G                     | KR         |                   |
| <i>Sisymbrium polymorphum</i> (Murray) Roth | G                     | KR         |                   |
| <i>Tragopogon major</i> Jacq.               | G                     | KR         |                   |
| <i>Trifolium arvense</i> L.                 | G                     | KR         |                   |
| <i>Trigonella monspeliaca</i> L.            | G                     | KR         |                   |
| <i>Valerianella carinata</i> Loisel.        | G                     | KR         |                   |
| <i>Verbascum lychnitis</i> L.               | G                     | KR         |                   |
| <i>Verbascum phoeniceum</i> L.              | G                     | KR         |                   |
| <i>Veronica arvensis</i> L.                 | G                     | KR         |                   |
| <i>Veronica triphyllos</i> L.               | G                     | KR         |                   |
| <i>Veronica verna</i> L.                    | G                     | KR         |                   |
| <i>Viola kitaibeliana</i> Schult.           | G                     | KR         |                   |

## References

Didukh YaP (ed) (2009) Chervona knyga Ukrainy. Globalkonsalting, Kiev

Mosyakin SL, Fedoronchuk MM (1999) Vascular Plants of Ukraine. A Nomenclatural Checklist. M. G. Kholodny Institute of Botany, National Academy of Sciences of Ukraine, Kiev

Red List of Kherson Region (2013) Decision of Kherson Regional Council "Chervonyi spysok Khersonskoi oblasti" № 893 of 13.11.2013
